# Supplementary material for: Sex-Specific Effects of Organophosphate Diazinon on the Gut Microbiome and Its Metabolic Functions
Source: PubMed Central journal article supplement (PMC5289904; doi:10.1289/ehp202), 2016-05-20
Supplement: EHP202.s001.acco.pdf [file EHP202.s001.acco.pdf]

**Note to readers with disabilities:** *EHP* strives to ensure that all journal content is accessible to all readers. However, some figures and Supplemental Material published in *EHP* articles may not conform to [508 standards](#) due to the complexity of the information being presented. If you need assistance accessing journal content, please contact [ehp508@niehs.nih.gov](mailto:ehp508@niehs.nih.gov). Our staff will work with you to assess and meet your accessibility needs within 3 working days.

## **Supplemental Material**

### **Sex-Specific Effects of Organophosphate Diazinon on the Gut Microbiome and Its Metabolic Functions**

Bei Gao, Xiaoming Bian, Ridwan Mahbub, and Kun Lu

#### **Table of Contents**

**Table S1.** Relative abundance of typical gut bacterial genera in the measurements for control and diazinon exposed male mice

**Table S2.** Relative abundance of typical gut bacterial genera in the measurements for control and diazinon exposed female mice

**Table S3.** Identified significantly changed fecal metabolites (fold change  $>1.5$   $p < 0.05$  compared to controls) in male mice

**Table S4.** Identified significantly changed fecal metabolites (fold change  $>1.5$   $p < 0.05$  compared to controls) in female mice

**Figure S1.** Distinct gut microbiome features were observed in male and female animals, as evidenced by the significant separation on the 3D-PCoA plot (A) (Red: Female; Blue: Male); Hierarchical clustering analysis by UPGMA indicates that male and female mice clustered in a gender-specific manner, with the UPGMA distance tree constructed at a distance of 0.1 (B).

**Figure S2.** Analysis at the Level 2 of Subsystem illustrate diazinon exposure altered the pathways of Amino acids and derivatives in a gender-selective manner. In male mice, the

pathways of *alanine, serine and glycine* and *aromatic amino acids and derivatives* were statistically significantly perturbed (A). In female mice, the pathway of *branched-chain amino acids* was altered (B). (\* indicates p-value <0.05).

**Figure S3.** Analysis at the Level 3 of Subsystem illustrate diazinon exposure altered the pathways of *aromatic amino acids and derivatives* in a gender-selective manner. In male mice, the specific pathways of *aromatic amino acid degradation* and *Chorismate: intermediate for synthesis of Tryptophan* were statistically significantly perturbed (A). No statistical significance was observed in female mice (B). (\* indicates p-value <0.05).

**Figure S4.** Serum metabolomic profiles were readily differentiated between the controls and diazinon-treated mice using principle component analysis (A: male mice; B: female mice). Pathway analysis using identified altered serum metabolites indicate that 7 and 5 metabolic pathways were significantly perturbed in male (C) and female animals (D) (p value <0.05), respectively. (Each dot represents one metabolic pathway; A metabolic pathway may not reach statistical significance if the number of metabolite hit in that specific pathway is too low; Only pathways with statistical significance are labeled herein).

**Figure S5.** Molecular features with p value <0.05 and fold change >1.5 were further filtered based on Variable Importance in Projection (VIP) scores associated with partial least squares discriminant analysis (PLS-DA) for the controls and treatment samples. Only features with VIP>1.8 were selected for identification with database search (A: male; B: female). These features are the most important ones to drive the separation between the controls and treatment samples.

**Figure S6.** The body weight gain was statistically significantly different between the controls and treated male mice after exposure to diazinon for 13 weeks ( $p=0.017$  by Welch two sample t-test) (A); However, there was no statistically significant difference between controls and diazinon-treated female animals ( $p=0.24$ ) (B). (All boxes extend from the 25th to the 75th percentile, horizontal bars represent the median, whiskers extend 1.5 times the length of the interquartile range (IQR) above and below the 75th and 25th percentiles, respectively, and outliers are represented as points).

**Table S1.** Relative abundance of typical gut bacterial genera in the measurements for control and diazinon exposed male mice<sup>a</sup>.

| <b>Bacterial genus</b>                                 | <b>Relative abundance (diazinon)</b> | <b>Standard error (diazinon)</b> | <b>Relative abundance (control)</b> | <b>Standard error (control)</b> |
|--------------------------------------------------------|--------------------------------------|----------------------------------|-------------------------------------|---------------------------------|
| Porphyromonadaceae_Tannerella*                         | 0.015527766                          | 0.001545025                      | 4.02E-05                            | 1.65E-05                        |
| Bacteroidetes_Other*                                   | 8.02E-05                             | 3.53E-05                         | 0.001177756                         | 0.000124101                     |
| Bacteria_Other*                                        | 0.001552017                          | 0.000294407                      | 0.000246462                         | 7.12E-05                        |
| Burkholderiales_Other*                                 | 0.001342627                          | 0.000312732                      | 0                                   | 0                               |
| Porphyromonadaceae_Other*                              | 0.537398908                          | 0.076928548                      | 0.205295077                         | 0.0291641                       |
| TM7_genera_incertae_sedis_Other*                       | 0.000178574                          | 5.09E-05                         | 0                                   | 0                               |
| Lachnospiraceae_Johnsonella*                           | 0.000586331                          | 0.000133459                      | 0.006825016                         | 0.001879704                     |
| Lachnospiraceae_Shuttleworthia*                        | 0                                    | 0                                | 0.000132376                         | 4.07E-05                        |
| Lachnospiraceae_Butyrivibrio*                          | 0                                    | 0                                | 0.000121039                         | 3.88E-05                        |
| Bacteroidales_Other*                                   | 0.000572344                          | 0.00018396                       | 7.34E-06                            | 7.34E-06                        |
| Porphyromonadaceae_Parabacteroides*                    | 0.067233592                          | 0.011232997                      | 0.143951124                         | 0.025158953                     |
| Staphylococcaceae_Staphylococcus*                      | 0                                    | 0                                | 2.94E-05                            | 1.11E-05                        |
| Lachnospiraceae_Other*                                 | 0.084933938                          | 0.03187199                       | 0.23443195                          | 0.046576008                     |
| Erysipelotrichaceae_Other*                             | 0.000147949                          | 0.000117405                      | 0.000719056                         | 0.000187227                     |
| Clostridiaceae_Other*                                  | 4.47E-05                             | 3.41E-05                         | 0                                   | 0                               |
| Erysipelotrichaceae_Allobaculum*                       | 0.001171793                          | 0.000321817                      | 0.003862776                         | 0.001059793                     |
| Lactobacillales_Other*                                 | 1.17E-05                             | 1.17E-05                         | 0.000179171                         | 6.87E-05                        |
| Erysipelotrichaceae_Coprobacillus*                     | 6.18E-05                             | 2.60E-05                         | 0                                   | 0                               |
| Bacteroidaceae_Bacteroides*                            | 0.017143971                          | 0.007316389                      | 8.72E-06                            | 8.72E-06                        |
| Lachnospiraceae_Hespellia                              | 3.51E-05                             | 3.51E-05                         | 0.000468865                         | 0.000197602                     |
| Ruminococcaceae_Other                                  | 0.013120116                          | 0.004488096                      | 0.031522134                         | 0.007456963                     |
| Clostridiaceae_Clostridiaceae 1                        | 0.016905914                          | 0.004453174                      | 0.061013566                         | 0.020570682                     |
| Verrucomicrobiaceae_Akkermansia                        | 0.002000862                          | 0.000987381                      | 0                                   | 0                               |
| Ruminococcaceae_Acetanaerobacterium                    | 0.001370869                          | 0.000364279                      | 0.00361097                          | 0.001135669                     |
| Erysipelotrichaceae_Erysipelotrichaceae Incertae Sedis | 0                                    | 0                                | 0.000185493                         | 0.000102008                     |
| Incertae Sedis XIII_Anaerovorax                        | 0.000285997                          | 6.84E-05                         | 0.000679013                         | 0.000206743                     |
| Anaeroplasmataceae_Anaeroplasma                        | 0.012968852                          | 0.005038154                      | 0.027610876                         | 0.006710293                     |
| Enterobacteriaceae_Klebsiella                          | 0                                    | 0                                | 5.69E-05                            | 3.45E-05                        |
| Ruminococcaceae_Ethanoligenens                         | 3.36E-05                             | 3.36E-05                         | 0.000171765                         | 8.04E-05                        |
| Lachnospiraceae_Lachnobacterium                        | 0.000363653                          | 0.000235776                      | 0                                   | 0                               |
| Rikenellaceae_Alistipes                                | 0.00013229                           | 8.71E-05                         | 0                                   | 0                               |
| Ruminococcaceae_Ruminococcus                           | 0.002021593                          | 0.001050989                      | 0.005409658                         | 0.001979717                     |
| Betaproteobacteria_Other                               | 3.37E-05                             | 3.37E-05                         | 0                                   | 0                               |
| Erysipelotrichaceae_Bulleidia                          | 1.68E-05                             | 1.68E-05                         | 0                                   | 0                               |

|                                                |             |             |             |             |
|------------------------------------------------|-------------|-------------|-------------|-------------|
| Lachnospiraceae_Parasporobacterium             | 0.0040138   | 0.001142035 | 0.007020844 | 0.001764954 |
| Ruminococcaceae_Ruminococcaceae Incertae Sedis | 0.003187884 | 0.000709367 | 0.005097599 | 0.001361502 |
| Lactobacillaceae_Lactobacillus                 | 0.021096805 | 0.004506397 | 0.050446356 | 0.024051435 |
| Lachnospiraceae_Lachnospira                    | 0.002050337 | 0.000709393 | 0.005306687 | 0.002781304 |
| Erysipelotrichaceae_Turicibacter               | 0.030454452 | 0.004442096 | 0.037431407 | 0.004647944 |
| Ruminococcaceae_Sporobacter                    | 0.0043351   | 0.001805655 | 0.006474919 | 0.001051172 |
| Bradyrhizobiaceae_Afipia                       | 1.69E-05    | 1.69E-05    | 0           | 0           |
| Erysipelotrichaceae_Holdemania                 | 3.59E-05    | 2.20E-05    | 3.08E-05    | 1.78E-05    |
| Incertae Sedis XI_Anaerococcus                 | 0           | 0           | 1.34E-05    | 1.34E-05    |
| Lactobacillaceae_Other                         | 0           | 0           | 3.22E-05    | 3.22E-05    |
| Streptococcaceae_Streptococcus                 | 0           | 0           | 1.34E-05    | 1.34E-05    |
| Lachnospiraceae_Bryantella                     | 0.004062191 | 0.002419823 | 0.006160614 | 0.001770821 |
| Lachnospiraceae_Roseburia                      | 0.001219102 | 0.000352915 | 0.001755485 | 0.000706761 |
| Lachnospiraceae_Dorea                          | 0.017511316 | 0.008339426 | 0.01221034  | 0.002203258 |
| Eubacteriaceae_Anaerofustis                    | 2.02E-05    | 1.26E-05    | 1.61E-05    | 1.61E-05    |
| Ruminococcaceae_Faecalibacterium               | 2.93E-05    | 1.85E-05    | 7.34E-06    | 7.34E-06    |
| Alphaproteobacteria_Other                      | 6.33E-05    | 4.01E-05    | 3.88E-05    | 1.58E-05    |
| Coriobacteriales_Coriobacterineae              | 0.000402264 | 0.000174141 | 0.000543562 | 0.000226359 |
| Firmicutes_Other                               | 0.00128476  | 0.000254072 | 0.001903292 | 0.001287543 |
| Lachnospiraceae_Lachnospiraceae Incertae Sedis | 0.067987204 | 0.021700208 | 0.07765687  | 0.002043561 |
| Ruminococcaceae_Anaerotruncus                  | 0.013359524 | 0.005809011 | 0.010550185 | 0.003940834 |
| Clostridiaceae_Clostridiaceae 2                | 0.002095988 | 0.000392632 | 0.001906603 | 0.000481005 |
| Clostridiales_Other                            | 0.044532633 | 0.007597974 | 0.042497261 | 0.003420444 |
| Ruminococcaceae_Papillibacter                  | 0.004929792 | 0.001042412 | 0.005043531 | 0.001114149 |
| Carnobacteriaceae_Carnobacteriaceae 2          | 0           | 0           | 8.72E-06    | 8.72E-06    |
| Carnobacteriaceae_Other                        | 0           | 0           | 6.69E-06    | 6.69E-06    |
| Clostridia_Other                               | 8.41E-06    | 8.41E-06    | 2.34E-05    | 1.53E-05    |
| Enterococcaceae_Enterococcus                   | 8.41E-06    | 8.41E-06    | 8.72E-06    | 8.72E-06    |
| Flavobacteriaceae_Flavobacterium               | 1.69E-05    | 1.69E-05    | 7.34E-06    | 7.34E-06    |
| Flexibacteraceae_Cardinium                     | 0           | 0           | 7.34E-06    | 7.34E-06    |
| Flexibacteraceae_Other                         | 0           | 0           | 7.34E-06    | 7.34E-06    |
| Streptophyta_Other                             | 0           | 0           | 1.61E-05    | 1.61E-05    |

Relative abundance and standard error of individual bacterial genus were calculated by Metastats.

\*: p value <0.05 when comparing the controls and diazinon-treated male mice.

"The "Other" assignments are typically due to ambiguity when the RDP classifier tries to assign at the desired level.

**Table S2.** Relative abundance of typical gut bacterial genera in the measurements for control and diazinon exposed female mice<sup>a</sup>.

| <b>Bacterial genus</b>                                  | <b>Relative abundance (diazinon)</b> | <b>Standard error (diazinon)</b> | <b>Relative abundance (control)</b> | <b>Standard error (control)</b> |
|---------------------------------------------------------|--------------------------------------|----------------------------------|-------------------------------------|---------------------------------|
| Clostridiaceae_Clostridiaceae 2*                        | 0.003458619                          | 0.000828862                      | 0.012540825                         | 0.001354591                     |
| Lachnospiraceae_Roseburia*                              | 5.27E-05                             | 2.21E-05                         | 0.000209476                         | 3.42E-05                        |
| Clostridiaceae_Clostridiaceae 1*                        | 0.061952236                          | 0.008370006                      | 0.027014167                         | 0.005424855                     |
| Lachnospiraceae_Johnsonella*                            | 0.005963605                          | 0.000740144                      | 0.003478387                         | 0.000164421                     |
| Porphyromonadaceae_Other*                               | 0.399557821                          | 0.015892862                      | 0.326684115                         | 0.016064827                     |
| Erysipelotrichaceae_Allobaculum*                        | 0.001525694                          | 0.000653572                      | 0.004798136                         | 0.000846603                     |
| Ruminococcaceae_Other*                                  | 0.016573418                          | 0.001562632                      | 0.024547067                         | 0.002259338                     |
| Clostridiales_Other*                                    | 0.026358609                          | 0.004103712                      | 0.044492961                         | 0.00565986                      |
| Lachnospiraceae_Other*                                  | 0.07158608                           | 0.009091446                      | 0.097595947                         | 0.004501038                     |
| Ruminococcaceae_Ruminococcus*                           | 0.001392252                          | 0.000439532                      | 0.008777964                         | 0.002855036                     |
| Incertae Sedis XIII_Anaerovorax*                        | 0.000415317                          | 7.71E-05                         | 0.000905692                         | 0.000177361                     |
| Lachnospiraceae_Lachnospira*                            | 0.002010958                          | 0.000774436                      | 0.006660515                         | 0.001821575                     |
| Erysipelotrichaceae_Erysipelotrichaceae Incertae Sedis* | 2.37E-05                             | 1.70E-05                         | 0.000180352                         | 6.54E-05                        |
| Clostridia_Other                                        | 2.03E-05                             | 1.39E-05                         | 6.45E-05                            | 1.60E-05                        |
| Bacteria_Other                                          | 0.000319041                          | 8.30E-05                         | 0.000529718                         | 5.90E-05                        |
| Firmicutes_Other                                        | 0.001802876                          | 0.000398207                      | 0.005570144                         | 0.002038302                     |
| Streptococcaceae_Streptococcus                          | 6.30E-06                             | 6.30E-06                         | 6.22E-05                            | 3.21E-05                        |
| Clostridiaceae_Other                                    | 0.000181914                          | 6.06E-05                         | 0.000384979                         | 0.000113314                     |
| Bacteroidales_Other                                     | 0.000126501                          | 5.04E-05                         | 4.62E-05                            | 1.29E-05                        |
| Ruminococcaceae_Anaerotruncus                           | 0.000592008                          | 0.000161404                      | 0.000876504                         | 9.37E-05                        |
| Staphylococcaceae_Staphylococcus                        | 0                                    | 0                                | 3.81E-05                            | 3.04E-05                        |
| Ruminococcaceae_Sporobacter                             | 0.00583425                           | 0.000978362                      | 0.004172091                         | 0.001051322                     |
| Erysipelotrichaceae_Coprobacillus                       | 0                                    | 0                                | 2.69E-05                            | 1.20E-05                        |
| Lactobacillales_Other                                   | 5.95E-05                             | 4.14E-05                         | 0.000146385                         | 6.69E-05                        |
| Erysipelotrichaceae_Turicibacter                        | 0.070406973                          | 0.007343036                      | 0.087488662                         | 0.014208233                     |
| Enterobacteriaceae_Klebsiella                           | 1.40E-05                             | 1.40E-05                         | 0                                   | 0                               |
| Porphyromonadaceae_Parabacteroides                      | 0.147112334                          | 0.0112601                        | 0.158722372                         | 0.005178616                     |
| Lachnospiraceae_Acetitomaculum                          | 0.00080638                           | 0.00021865                       | 0.000553528                         | 0.00017136                      |
| Ruminococcaceae_Acetanaerobacterium                     | 0.00201382                           | 0.000186682                      | 0.002509007                         | 0.000591777                     |
| Lactobacillaceae_Lactobacillus                          | 0.030946907                          | 0.003726459                      | 0.035545119                         | 0.005252514                     |
| Bacteroidetes_Other                                     | 0.00094184                           | 0.000272568                      | 0.001139627                         | 7.49E-05                        |
| Anaplasmataceae_Wolbachia                               | 0                                    | 0                                | 1.35E-05                            | 1.35E-05                        |
| Lactobacillaceae_Other                                  | 0                                    | 0                                | 1.43E-05                            | 8.81E-06                        |
| Streptophyta_Other                                      | 0                                    | 0                                | 1.30E-05                            | 7.97E-06                        |

|                                                   |             |             |             |             |
|---------------------------------------------------|-------------|-------------|-------------|-------------|
| Lachnospiraceae_Shuttleworthia                    | 0           | 0           | 2.22E-05    | 9.21E-06    |
| Ruminococcaceae_Ruminococcaceae<br>Incertae Sedis | 0.004661264 | 0.000389768 | 0.005350086 | 0.001174142 |
| Bacilli_Other                                     | 2.03E-05    | 1.39E-05    | 1.77E-05    | 1.10E-05    |
| Ruminococcaceae_Ethanoligenens                    | 1.97E-05    | 1.97E-05    | 3.12E-05    | 2.42E-05    |
| Lachnospiraceae_Dorea                             | 0.07943636  | 0.005017129 | 0.073098108 | 0.012352289 |
| Coriobacteriales_Coriobacterineae                 | 0.000648983 | 0.000269001 | 0.000523992 | 7.58E-05    |
| TM7_genera_incertae_sedis_Other                   | 4.34E-05    | 2.11E-05    | 5.91E-05    | 3.06E-05    |
| Lachnospiraceae_Lachnospiraceae<br>Incertae Sedis | 0.034079006 | 0.00335465  | 0.036490779 | 0.004764343 |
| Erysipelotrichaceae_Holdemania                    | 3.23E-05    | 2.06E-05    | 2.89E-05    | 1.90E-05    |
| Lachnospiraceae_Parasporobacterium                | 0.004107562 | 0.000788197 | 0.00443112  | 0.000477824 |
| Ruminococcaceae_Papillibacter                     | 0.002112699 | 0.00027156  | 0.002223404 | 0.000240653 |
| Erysipelotrichaceae_Other                         | 0.000479939 | 0.000127357 | 0.000547672 | 0.000190107 |
| Anaeroplasmataceae_Anaeroplasma                   | 0.019291342 | 0.002700468 | 0.018417645 | 0.002890365 |
| Lachnospiraceae_Bryantella                        | 0.002415938 | 0.000337069 | 0.002328933 | 0.000317619 |
| Proteobacteria_Other                              | 0.000136773 | 5.27E-05    | 0.00012022  | 7.44E-05    |
| Lachnospiraceae_Hespellia                         | 0.000390392 | 0.000249756 | 0.000433064 | 0.000133148 |
| Carnobacteriaceae_Other                           | 0           | 0           | 8.33E-06    | 8.33E-06    |
| Lachnospiraceae_Oribacterium                      | 0           | 0           | 1.01E-05    | 1.01E-05    |
| Actinobacteria_Other                              | 3.06E-05    | 3.06E-05    | 8.33E-06    | 8.33E-06    |
| Bacillaceae_Bacillaceae 2                         | 0           | 0           | 6.73E-06    | 6.73E-06    |
| Moraxellaceae_Acinetobacter                       | 0           | 0           | 8.33E-06    | 8.33E-06    |
| Porphyromonadaceae_Tannerella                     | 3.71E-05    | 2.28E-05    | 2.34E-05    | 1.63E-05    |
| Pseudomonadaceae_Other                            | 0           | 0           | 8.33E-06    | 8.33E-06    |

Relative abundance and standard error of individual bacterial genus were calculated by

Metastats.

\*: p value <0.05 when comparing the controls and diazinon-treated female mice.

<sup>a</sup>The "Other" assignments are typically due to ambiguity when the RDP classifier tries to assign at the desired level.

**Table S3.** Identified significantly changed fecal metabolites (fold change >1.5 p < 0.05 compared to controls) in male mice

| Name                          | Fold    | p value | Mass   | Retention time | Gut flora related | Pathways or functions            |
|-------------------------------|---------|---------|--------|----------------|-------------------|----------------------------------|
| Taurine                       | -106.15 | 0.001   | 326.20 | 18.52          | Y                 | Bile Acid Biosynthesis           |
| Glyceric acid                 | 4.66    | 0.016   | 232.20 | 13.27          |                   | Glycerolipid Metabolism          |
| L-Aspartic acid               | -4.41   | 0.015   | 235.20 | 14.86          |                   | Aspartate Metabolism             |
| Lithocholic acid              | 4.33    | 0.010   | 427.40 | 35.12          | Y                 | Bile Acid Biosynthesis           |
| 5-Hydroxyindoleacetic acid    | 4.15    | 0.045   | 409.30 | 24.92          | Y                 | Tryptophan Metabolism            |
| Glycine                       | -3.17   | 0.038   | 249.20 | 12.85          |                   | Alanine Metabolism               |
| alpha-Ketoglutaric acid       | -2.74   | 0.015   | 302.20 | 17.19          |                   | Citric Acid Cycle                |
| L-Proline                     | -2.57   | 0.049   | 175.20 | 12.73          |                   | Arginine and Proline Metabolism  |
| Stigmastanol                  | 2.54    | 0.010   | 237.20 | 34.95          | Y                 | Steroids and Steroid Derivatives |
| 2-Oleoylglycerol              | 2.48    | 0.028   | 107.20 | 30.41          | Y                 |                                  |
| Hydrocinnamic acid            | -2.39   | 0.003   | 132.10 | 14.81          | Y                 | phenylalanine metabolism         |
| Octadecanoic acid             | -2.24   | 0.018   | 359.30 | 25.76          |                   | Fatty acid metabolism            |
| Butanedioic acid              | -2.22   | 0.019   | 150.10 | 13.01          | Y                 | Citric Acid Cycle                |
| 5-Aminovaleric acid           | -2.20   | 0.011   | 266.20 | 17.95          |                   | Amino acid biosynthesis          |
| L-Isoleucine                  | -2.18   | 0.027   | 114.10 | 12.62          |                   | Leucine and Isoleucine           |
| DL-Phenylalanine              | -2.13   | 0.041   | 65.10  | 16.84          | Y                 | Phenylalanine/Tyrosine           |
| Campesterol                   | 2.09    | 0.013   | 177.20 | 35.00          | Y                 | Steroids and Steroid Derivatives |
| L-Threonine                   | -1.97   | 0.037   | 146.20 | 12.66          |                   | Glycine and Serine Metabolism    |
| (Hydroxyphenyl)propanoic acid | -1.96   | 0.009   | 311.20 | 19.42          | Y                 | Phenols and Derivatives          |
| Linoleic acid                 | 1.95    | 0.014   | 245.20 | 25.34          |                   | Linoleic Acid Metabolism         |
| Glycerol 3-phosphate          | 1.89    | 0.035   | 274.20 | 19.80          |                   | Glycerolipid Metabolism          |
| Stigmasterol                  | 1.87    | 0.024   | 76.10  | 35.21          | Y                 | Steroids and Steroid Derivatives |
| Cholesterol                   | 1.79    | 0.047   | 299.30 | 34.16          | Y                 | Bile Acid Biosynthesis           |
| L-Glutamic acid               | -1.77   | 0.026   | 130.10 | 17.86          |                   | Amino acid metabolism            |
| 3-Hydroxypyridine             | -1.77   | 0.009   | 64.10  | 8.01           |                   | Propanoate Metabolism            |
| L-Valine                      | -1.72   | 0.007   | 113.10 | 11.24          |                   | Phenols and Derivatives          |
| 4-Hydroxyphenylacetic acid    | -1.69   | 0.043   | 78.10  | 18.16          | Y                 | Tyrosine Metabolism              |
| Phenylacetic acid             | -1.52   | 0.040   | 75.10  | 12.76          | Y                 | Phenylacetic Acid Derivatives    |
| L-Alanine                     | -1.66   | 0.046   | 70.10  | 9.18           |                   | Alanine Metabolism               |
| Uracil                        | -1.64   | 0.007   | 127.10 | 13.39          |                   | Beta-Alanine Metabolism          |
| (Methoxyimino)propanoic acid  | -1.63   | 0.037   | 115.10 | 8.20           |                   |                                  |
| Palmitic acid                 | -1.60   | 0.045   | 317.30 | 23.48          |                   | Fatty Acid Biosynthesis          |

**Table S4.** Identified significantly changed fecal metabolites (fold change >1.5 p < 0.05 compared to controls) in female mice.

| Name                          | Fold  | p value | Mass   | Retention Time | Gut flora related | Pathways or functions            |
|-------------------------------|-------|---------|--------|----------------|-------------------|----------------------------------|
| l-Aspartic acid               | 15.70 | 0.020   | 207.20 | 14.85          |                   | Amino Acids and Derivatives      |
| Lithocholic acid              | 5.09  | 0.004   | 592.50 | 35.10          | Y                 | Bile Acid Biosynthesis           |
| 5beta-Cholestanone            | -5.09 | 0.030   | 328.40 | 33.42          | Y                 | Cholesterols and Derivatives     |
| (Hydroxyphenyl)propanoic acid | -3.89 | 0.023   | 311.20 | 19.41          | Y                 | Phenols and Derivatives          |
| Deoxycholic acid              | 3.62  | 0.001   | 253.30 | 35.21          | Y                 | Bile Acid Biosynthesis           |
| Stigmastanol                  | -3.03 | 0.017   | 488.60 | 34.94          | Y                 | Steroids and Steroid Derivatives |
| L-Alanine                     | 2.75  | 0.008   | 101.10 | 9.19           |                   | Amino Acids and Derivatives      |
| 2-Oleoylglycerol              | -2.53 | 0.016   | 67.20  | 33.40          | Y                 |                                  |
| 3-Glycerophosphate            | -2.48 | 0.024   | 117.10 | 19.80          |                   | Glycerolipid Metabolism          |
| Carbamic acid                 | 2.13  | 0.017   | 205.10 | 7.81           |                   | Amino Acids and Derivatives      |
| Stigmasterol                  | 2.05  | 0.010   | 184.20 | 35.20          | Y                 | Steroids and Steroid Derivatives |
| 5alpha-Cholestanol            | -2.02 | 0.034   | 258.30 | 34.26          | Y                 | Cholesterols and Derivatives     |
| Cholesterol                   | -2.01 | 0.049   | 371.40 | 34.18          | Y                 | Bile Acid Biosynthesis           |
| Behenic acid                  | -1.89 | 0.032   | 353.40 | 29.71          |                   | Fatty Acids and Conjugates       |
| Tetracosanoic acid            | -1.67 | 0.001   | 381.40 | 31.50          |                   | Fatty Acids metabolism           |
| Hydrocinnamic acid            | 1.61  | 0.014   | 65.10  | 14.79          |                   | phenylalanine metabolism         |
| Lactic acid                   | 1.53  | 0.019   | 107.10 | 8.42           | Y                 | Pyruvate Metabolism              |
| Fumaric acid                  | 1.51  | 0.011   | 144.15 | 13.64          | Y                 | Citrate cycle                    |



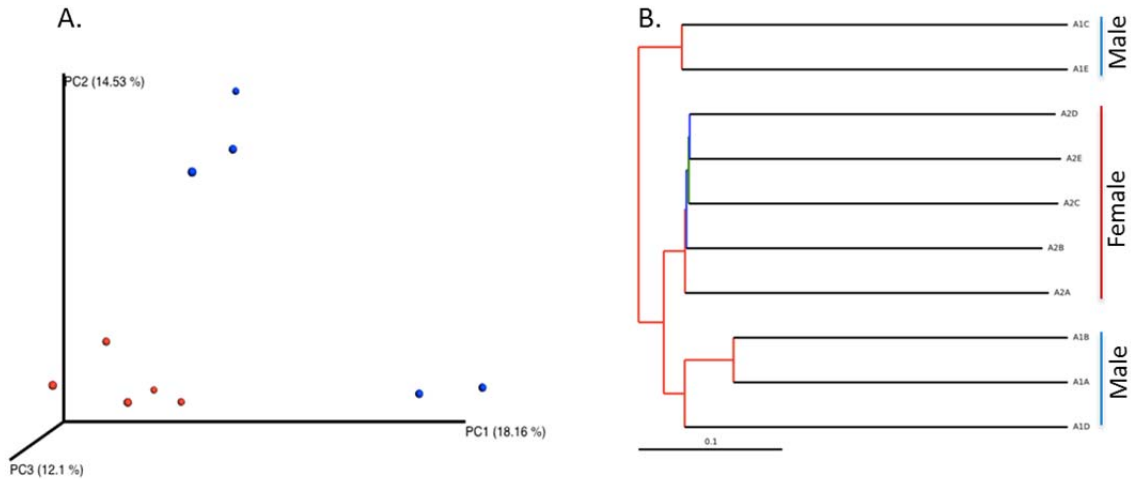

**Figure S1.** Distinct gut microbiome features were observed in male and female animals, as evidenced by the significant separation on the 3D-PCoA plot (A) (Red: Female; Blue: Male); Hierarchical clustering analysis by UPGMA indicates that male and female mice clustered in a gender-specific manner, with the UPGMA distance tree constructed at a distance of 0.1 (B).

## Leve 2 analysis (Amino acids and derivatives)

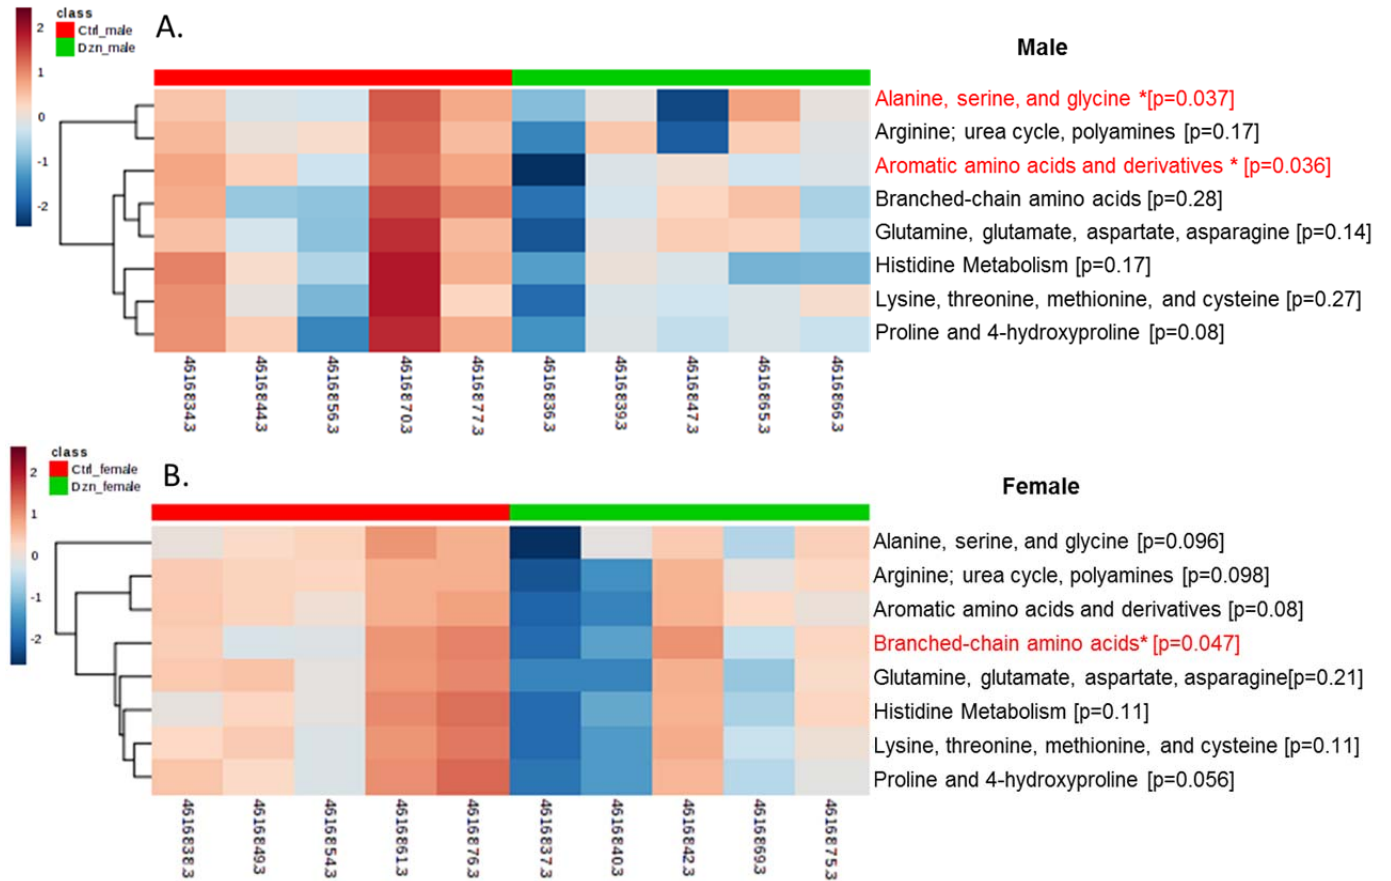

**Figure S2.** Analysis at the Level 2 of Subsystem illustrate diazinon exposure altered the pathways of Amino acids and derivatives in a gender-selective manner. In male mice, the pathways of *alanine, serine and glycine* and *aromatic amino acids and derivatives* were statistically significantly perturbed (A). In female mice, the pathway of *branched-chain amino acids* was altered (B). (\* indicates p-value <0.05).

### Leve 3 analysis (Aromatic amino acids and derivatives)

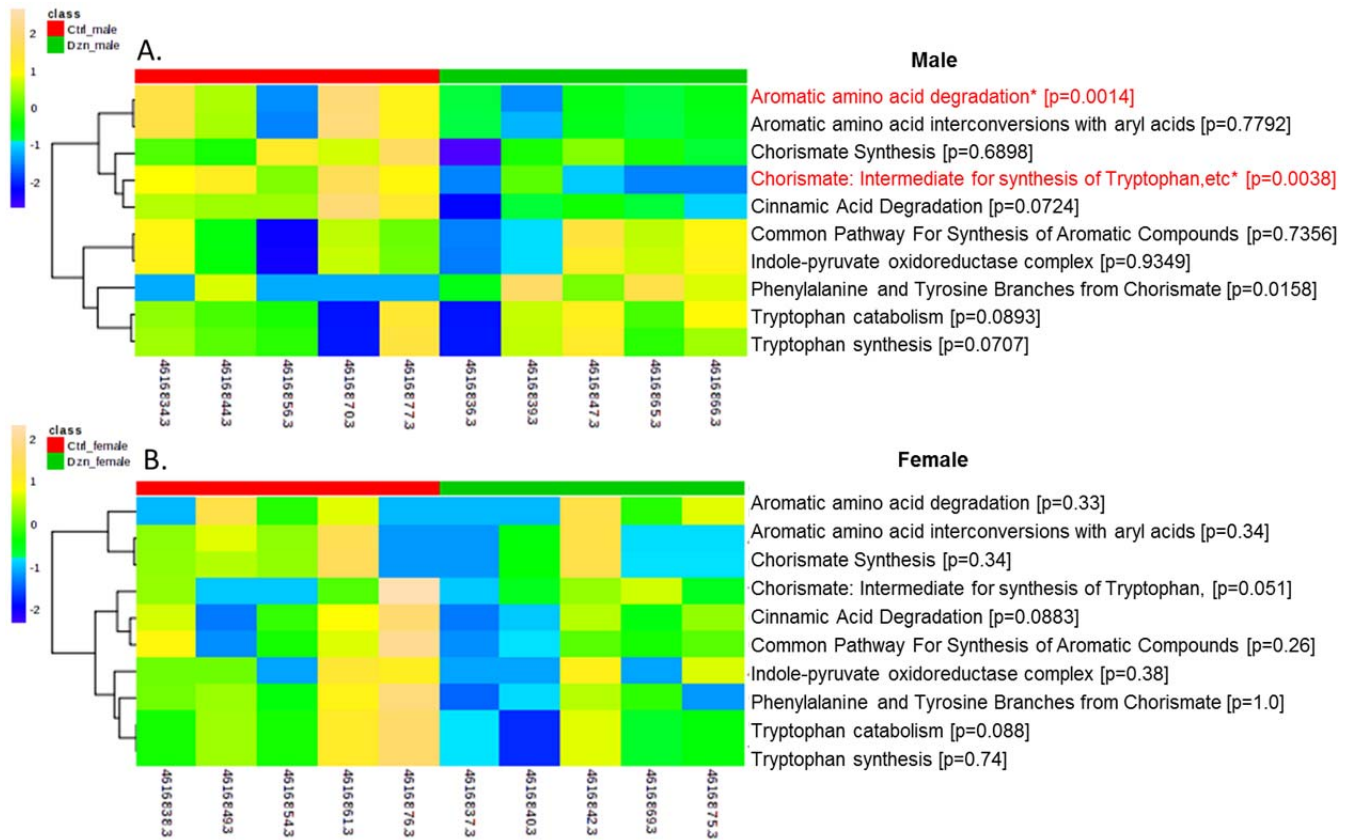

**Figure S3.** Analysis at the Level 3 of Subsystem illustrate diazinon exposure altered the pathways of *aromatic amino acids and derivatives* in a gender-selective manner. In male mice, the specific pathways of *aromatic amino acid degradation* and *Chorismate: intermediate for synthesis of Tryptophan* were statistically significantly perturbed (A). No statistical significance was observed in female mice (B). (\* indicates p-value <0.05).

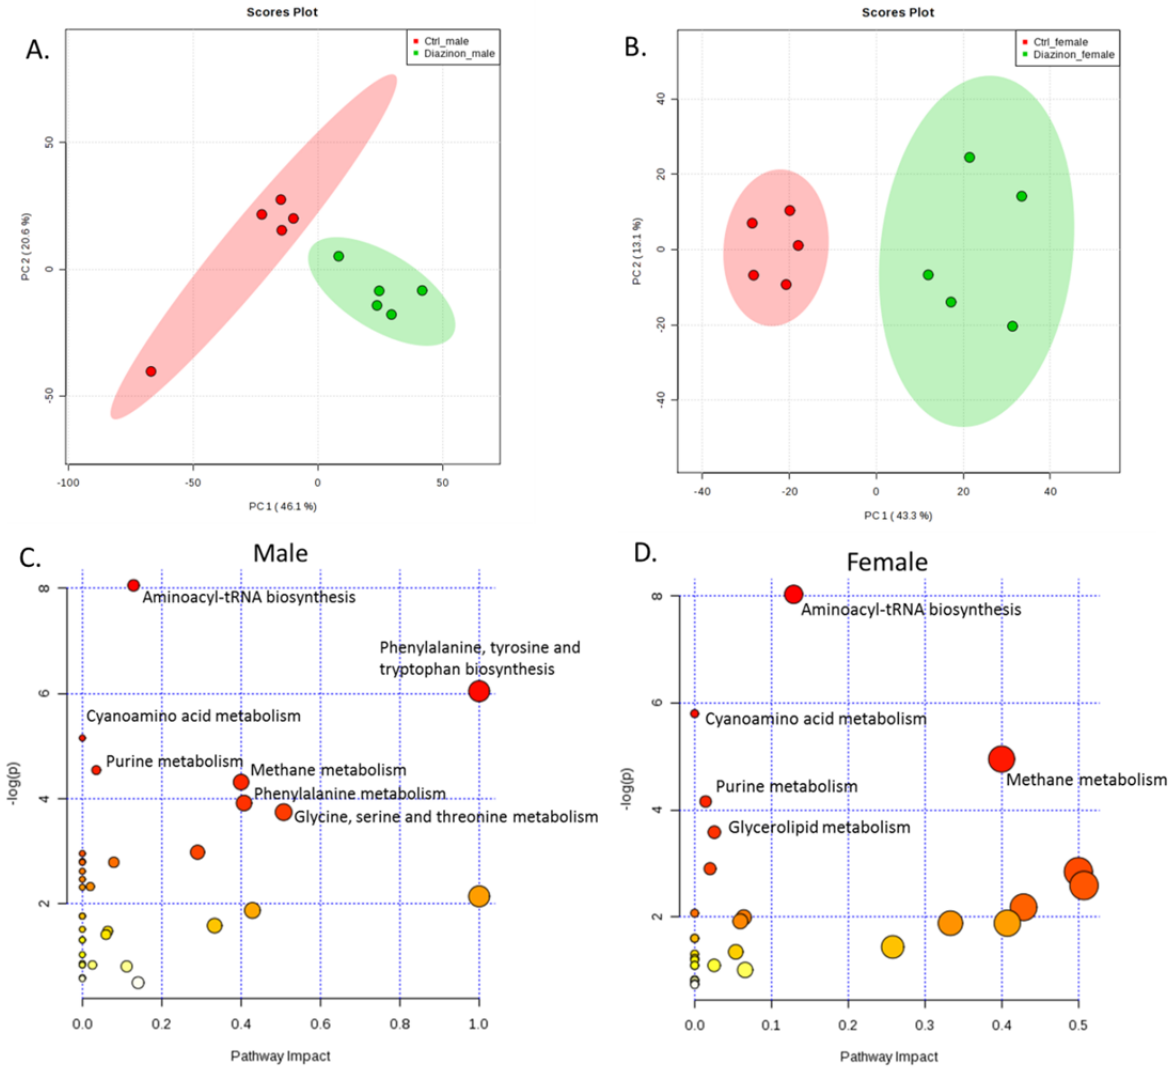

**Figure S4.** Serum metabolomic profiles were readily differentiated between the controls and diazinon-treated mice using principle component analysis (A: male mice; B: female mice). Pathway analysis using identified altered serum metabolites indicate that 7 and 5 metabolic pathways were significantly perturbed in male (C) and female animals (D) (p value < 0.05), respectively. (Each dot represents one metabolic pathway; A metabolic pathway may not reach statistical significance if the number of metabolite hit in that specific pathway is too low; Only pathways with statistical significance are labeled herein).

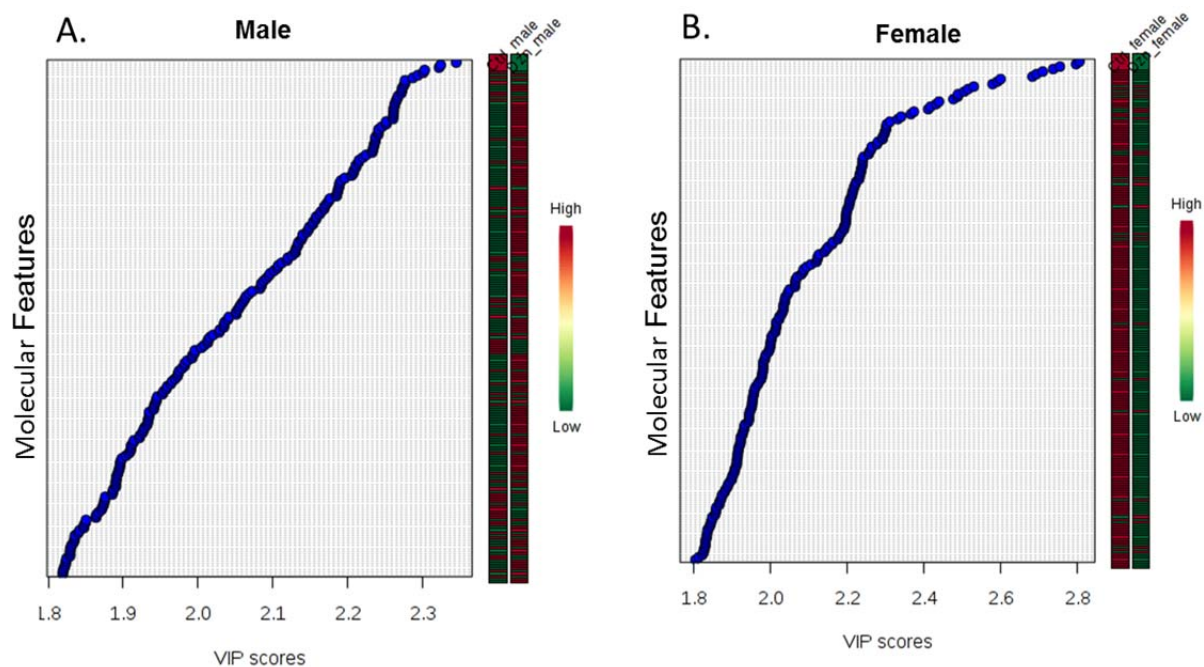

**Figure S5.** Molecular features with p value  $<0.05$  and fold change  $>1.5$  were further filtered based on Variable Importance in Projection (VIP) scores associated with partial least squares discriminant analysis (PLS-DA) for the controls and treatment samples. Only features with  $VIP > 1.8$  were selected for identification with database search (A: male; B: female). These features are the most important ones to drive the separation between the controls and treatment samples.

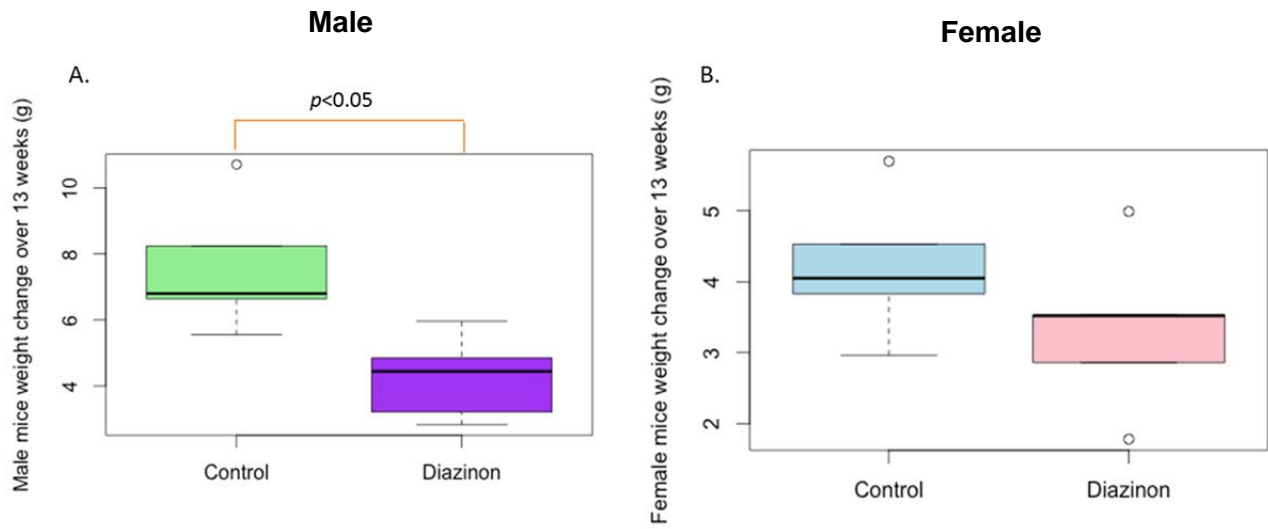

**Figure S6.** The body weight gain was statistically significantly different between the controls and treated male mice after exposure to diazinon for 13 weeks ( $p=0.017$  by Welch two sample t-test) (A); However, there was no statistically significant difference between controls and diazinon-treated female animals ( $p=0.24$ ) (B). (All boxes extend from the 25th to the 75th percentile, horizontal bars represent the median, whiskers extend 1.5 times the length of the interquartile range (IQR) above and below the 75th and 25th percentiles, respectively, and outliers are represented as points).
